# Supplementary material
Source: MDPI journal article supplement (https://www.mdpi.com/2076-3417/12/7/3248)
Supplement: s1 [file s1]

## Supplementary File S2

### 1.1. Tongue morphology assessment with NBI

#### 1.1.1. The number of fungiform papillae

39 of 52 (75 %) patients were included in the within-group and between-group  $N_{\text{papillae}}$  analysis.

##### 1.1.1.1. Within-group analysis

A Friedman test was run to determine if there were differences in  $N_{\text{papillae}}$  on the test and control side. Pairwise comparisons were performed with a Bonferroni correction for multiple comparisons.

The  $N_{\text{papillae}}$  decreased statistically significantly during follow-up on a test side,  $\chi^2(2) = 9.379$ ,  $p = .009$ . Post hoc analysis revealed statistically significant differences in  $N_{\text{papillae}}$  from preoperatively ( $Mdn = 5$ ) to 2nd check-up ( $Mdn = 4$ ) ( $p = .017$ ) but not preoperatively to 1st check-up ( $Mdn = 4$ ) and 1st to 2nd check-up.

On the control side, the  $N_{\text{papillae}}$  did not change statistically significantly from preoperative ( $Mdn=4$ ), to 1st ( $Mdn=5$ ) and to 2nd check-up ( $Mdn=4$ ),  $\chi^2(2) = 1.145$ ,  $p = .564$ .

##### 1.1.1.2. Between-group analysis

A Mann-Whitney U test was run to determine if there were differences in the  $N_{\text{papillae}}$  between sides at each check-up.

At preoperative check-up data distributions of the  $N_{\text{papillae}}$  were similar for both sides, as assessed by visual inspection.  $N_{\text{papillae}}$  were not statistically significantly different between the test ( $Mdn = 5$ ) and control side ( $Mdn = 4$ ),  $U = 858.500$ ,  $z = 1.006$ ,  $p = .315$ .

At 1st check-up data distributions of the  $N_{\text{papillae}}$  were similar for both sides, as assessed by visual inspection.  $N_{\text{papillae}}$  were not statistically significantly different between the test ( $Mdn = 4$ ) and control side ( $Mdn = 5$ ),  $U = 736.000$ ,  $z = .026$ ,  $p = .980$ .

At 2nd check-up data distributions of the  $N_{\text{papillae}}$  were similar for both sides, as assessed by visual inspection.  $N_{\text{papillae}}$  were not statistically significantly different between the test ( $Mdn = 4$ ) and control side ( $Mdn = 4$ ),  $U = 625.000$ ,  $z = -1.427$ ,  $p = .154$ .
