# Supplementary material
Source: MDPI journal article supplement (https://www.mdpi.com/2076-3417/12/7/3248)
Supplement: s1 [file s1]

## Supplementary File S1

### 1.1. Tongue morphology assessment with NBI

#### 1.1.1. The total score of blood vessel morphology

##### 1.1.1.1. Within-group analysis

32 of 52 patients (75%) were included in the within-group analysis of NBI<sub>total</sub> for the test and control side separately with Friedman's test. Pairwise comparisons were performed with a Bonferroni correction for multiple comparisons.

Within the test side, the NBI<sub>total</sub> has decreased statistically significantly during follow-up,  $\chi^2(2) = 10.800, p = .005$ . Post hoc analysis revealed statistically significant differences ( $p = .007$ ) in NBI<sub>total</sub> preoperatively ( $Mdn = 12$ ) to 2nd check-up ( $Mdn = 9$ ) but not preoperatively to 1st check-up ( $Mdn = 12$ ) and 1st to 2nd check-up.

Within the control side, the NBI<sub>total</sub> did not change statistically significantly from preoperatively ( $Mdn = 12$ ), to 1st check-up ( $Mdn = 12$ ) and to 2nd check-up ( $Mdn = 10$ ),  $\chi^2(2) = 0.444, p = .801$ .

##### 1.1.1.2. Between-group analysis

39 of 52 patients (75 %) were included in the between-group NBI<sub>total</sub> analysis which corresponds to 39 test and 39 control sides.

An independent-samples t-test was run to determine if there were differences between test and control side at preoperative check-up. There was one outlier in the test side, as assessed by inspection of a boxplot. NBI<sub>total</sub> was normally distributed in both groups preoperatively, as assessed by Shapiro-Wilk's test ( $p > .05$ ), and there was homogeneity of variances, as assessed by Levene's test for equality of variances ( $p = .657$ ). There was no statistically significant difference in the NBI<sub>total</sub> between the test ( $12.28 \pm 4.577$ ) and control side ( $11.85 \pm 4.171$ ),  $t(37) = -.440, p = .661$ .

An independent-samples t-test was run to determine if there were differences between test and control side at the 1st check-up. There were no outliers in both groups as assessed by inspection of a boxplot. NBI<sub>total</sub> was normally distributed in both groups at the 1st check-up, as assessed by Shapiro-Wilk's test ( $p > .05$ ), and there was homogeneity of variances, as assessed by Levene's test for equality of variances ( $p = .596$ ). There was no statistically significant difference in the NBI<sub>total</sub> between the test ( $10.97 \pm 4.215$ ) and control side ( $11.79 \pm 4.824$ ),  $t(76) = .800, p = .426$ .

Due to non-normal distributions in both groups a Mann-Whitney U test was run to determine if there were differences in NBI<sub>total</sub> between test and control side at 2nd check-up. Distributions of the NBI<sub>total</sub> were similar for both groups, as assessed by visual inspection. Median NBI No values were not statistically significantly different between test ( $Mdn = 9$ ) and control side ( $Mdn = 10$ ),  $U = 617.000, z = -1.449, p = .147$ .
