# Supplementary material
Source: MDPI journal article supplement (https://www.mdpi.com/2076-3417/12/7/3248)
Supplement: s1 [file s1]

## **Supplementary File S6. Chorda tympani manipulation analyses.**

### CT manipulation vs taste

Simple scatter plots were created before the Spearman's correlation test to determine the correlation between the degree of CT manipulation and difference in taste test strip sum score (for each taste and side of the tongue separately) between preoperative and first postoperative check-up and between first and second postoperative check-up. However, no monotonic or non-monotonic relationship was identified at the inspection of each scatterplot. For that reason, Spearman's correlation test was not run.

### CT manipulation vs two-point discrimination

Simple scatter plots were created before the Spearman's correlation test to determine the correlation between the degree of CT manipulation and difference in two-point discrimination (for each side of the tongue separately) between preoperative check-up and check-up six hours postoperatively and between check-up six hours postoperatively and second postoperative check-up. However, no monotonic or non-monotonic relationship was identified at the inspection of each scatterplot. For that reason, Spearman's correlation test was not run.

### CT manipulation vs $N_{\text{papillae}}$

Simple scatter plots were created before the Spearman's correlation test to determine the correlation between the degree of CT manipulation and difference in  $N_{\text{papillae}}$  (for each taste and side of the tongue separately) between preoperative and first postoperative check-up and between first and second postoperative check-up. However, no monotonic or non-monotonic relationship was identified at the inspection of each scatterplot. For that reason, Spearman's correlation test was not run.

### CT manipulation vs $\text{NBI}_{\text{total}}$

Simple scatter plots were created before the Spearman's correlation test to determine the correlation between the degree of CT manipulation and difference in  $\text{NBI}_{\text{total}}$  (for each taste and side of the tongue separately) between preoperative and first postoperative check-up and between first and second postoperative check-up. However, no monotonic or non-monotonic relationship was identified at the inspection of each scatterplot. For that reason, Spearman's correlation test was not run.

### CT manipulation vs $\text{NBI}_{\text{mean}}$

Simple scatter plots were created before the Spearman's correlation test to determine the correlation between the degree of CT manipulation and difference in  $\text{NBI}_{\text{mean}}$  (for each taste and side of the tongue separately) between preoperative and first postoperative check-up and between first and second postoperative check-up. However, no monotonic or non-

monotonic relationship was identified at the inspection of each scatterplot. For that reason, Spearman's correlation test was not run.
