# Supplementary material
Source: MDPI journal article supplement (https://www.mdpi.com/2076-3417/12/7/3248)
Supplement: s1 [file s1 › Supplementary File S3.pdf]

## Supplementary File S3

### 1.1. Tongue morphology assessment with NBI

#### 1.1.1. The mean score of blood vessel morphology

39 of 52 (75 %) patients were included in the between-group and within-group NBI<sub>mean</sub> analysis.

##### 1.1.1.1. Within-group analysis

Friedman's test and pairwise comparisons with a Bonferroni correction for multiple comparisons were performed to analyze differences between NBI<sub>mean</sub> during the follow-up within each side.

Within the test side the NBI<sub>mean</sub> did not change statistically significantly from preoperative (*Mdn* = 2.8), to 1st (*Mdn* = 2.5) and to 2nd check-up (*Mdn* = 2.0),  $\chi^2(2) = 1.327$ ,  $p = .515$ .

Within the control side the NBI<sub>mean</sub> did not change between check-ups (*Mdn* = 3.0),  $\chi^2(2) = .178$ ,  $p = .915$ .

##### 1.1.1.2. Between-group analysis

Mann Whitney U test was run to determine the differences in the NBI<sub>mean</sub> between the test and control side at the preoperative, 1st and 2nd check-ups.

At preoperative check-up data distributions of the NBI<sub>mean</sub> were similar for both sides, as assessed by visual inspection. NBI<sub>mean</sub> were not statistically significantly different between the test (*Mdn* = 2.8) and control side (*Mdn* = 3.0),  $U = 689.500$ ,  $z = -.735$ ,  $p = .462$ .

At 1st check-up data distributions of the NBI<sub>mean</sub> were similar for both sides, as assessed by visual inspection. NBI<sub>mean</sub> were not statistically significantly different between the test (*Mdn* = 2.5) and control side (*Mdn* = 3.0),  $U = 679.500$ ,  $z = -.848$ ,  $p = .396$ .

At 2nd check-up data distributions of the NBI<sub>mean</sub> were similar for both sides, as assessed by visual inspection. NBI<sub>mean</sub> were not statistically significantly different between the test (*Mdn* = 2.0) and control side (*Mdn* = 3.0),  $U = 687.500$ ,  $z = -.782$ ,  $p = .434$ .
