# Supplementary material
Source: MDPI journal article supplement (https://www.mdpi.com/2076-3417/12/7/3248)
Supplement: s1 [file s1 › Supplementary File S5.pdf]

## Supplementary File S5

### Two-point discrimination

40 of 52 patients (77 %) were included in 2 point discrimination measurement analysis. A Friedman test was run to determine if there were differences in two-point discrimination measurements within the test and control side and a Mann Whitney U test to determine if there were differences between sides at each check-up.

The score on the test side did not change statistically significantly from preoperative check-up ( $Mdn = 6$  mm), to check-up six hours postoperatively ( $Mdn = 6$  mm), to 1st ( $Mdn = 6$  mm), to 2nd check-up ( $Mdn = 7$  mm),  $\chi^2(3) = 7.568$ ,  $p = .056$ . On the control side, the score was the same at each measurement,  $Mdn = 6$  mm,  $\chi^2(3) = 1.000$ ,  $p = .801$ .

At preoperative check-up data distributions of the 2 point discrimination measurements were similar for both sides, as assessed by visual inspection. There were no statistically significant differences between the test ( $Mdn = 6$  mm) and control side ( $Mdn = 6$  mm),  $U = 759.500$ ,  $z = -.402$ ,  $p = .688$ .

At the check-up six hours postoperatively data distributions of the 2 point discrimination measurements were similar for both sides, as assessed by visual inspection. There were no statistically significant differences between the test ( $Mdn = 6$  mm) and control side ( $Mdn = 6$  mm),  $U = 822.500$ ,  $z = .223$ ,  $p = .824$ .

At the 1st check-up data distributions of the 2 point discrimination measurements were similar for both sides, as assessed by visual inspection. There were no statistically significant differences between the test ( $Mdn = 6$  mm) and control side ( $Mdn = 6$  mm),  $U = 801.000$ ,  $z = .010$ ,  $p = .992$ .

At the 2nd check-up data distributions of the 2 point discrimination measurements were similar for both sides, as assessed by visual inspection. There were no statistically significant differences between the test ( $Mdn = 7$  mm) and control side ( $Mdn = 6$  mm),  $U = 848.000$ ,  $z = .475$ ,  $p = .635$ .
